# Supplementary material
Source: PubMed Central journal article supplement (PMC4396822)
Supplement: NIHMS674059-supplement-web_ref.pdf [file NIHMS674059-supplement-web_ref.pdf]

## Appendix 1: Web references

[Web reference 1, Appendix 1] Blythe MJ, Fortenberry JD and Orr DP. Douching behaviours reported by adolescent and young adult women at high risk for sexually transmitted infections. *Journal of Paediatric and Adolescent Gynaecology* 2003;**16**(2):95-100.

[Web reference 2, Appendix 1] Brotman RM, Bradford LL, Gajer P et al. Association between *Trichomonas vaginalis* and vaginal bacterial community composition among reproductive-age women. *Sex Transm Dis* 2012;**39**(10):807-12.

[Web reference 3, Appendix 1] Nathan B, Appiah J, Heron D et al. Evaluation of five different tests for *Trichomonas vaginalis* and cost effective planning for clinical implementation. Poster presented at the British Association for Sexual Health and HIV Spring meeting. May 2013. Abstract available at *Int J STD AIDS* May 2013 24: 1-60, doi:10.1177/0956462413484421

[Web reference 4, Appendix 1] Muir P. Economic Evaluation of the Aptima TV TMA. 2013. Available at <http://public.ukcrn.org.uk/search/StudyDetail.aspx?StudyID=13827> (accessed on 20<sup>th</sup> June 2013).

[Web reference 5, Appendix 1] Chapin KC, Andrea SB, Florczyk et al. Comparison of Transcription Mediated Amplification (TMA) and Polymerase Chain Reaction (PCR) methods for detection of *Trichomonas vaginalis* from SUN study patients [abstract]. Natl. STD Prev. Conf. Centers for Disease Control and Prevention, Atlanta, GA 2010:P75.
